# Supplementary material
Source: MDPI journal article supplement (https://www.mdpi.com/2673-7256/2/1/14)
Supplement: s1 [file s1]

## Supplementary Materials

# Phosphorescence of Hydrogen-Capped Linear Polyynes $C_8H_2$ , $C_{10}H_2$ and $C_{12}H_2$ in Solid Hexane Matrices at 20 K

Tomonari Wakabayashi <sup>1,\*</sup>, Urszula Szczepaniak <sup>2</sup>, Kaito Tanaka <sup>1</sup>, Satomi Saito <sup>1</sup>, Keisuke Fukumoto <sup>1</sup>, Riku Ohnishi <sup>1</sup>, Kazunori Ozaki <sup>1</sup>, Taro Yamamoto <sup>1</sup>, Hal Suzuki <sup>1</sup>, Jean-Claude Guillemin <sup>3</sup>, Haruo Shiromaru <sup>4</sup>, Takeshi Kodama <sup>5</sup> and Miho Hatanaka <sup>6</sup>

<sup>1</sup> Department of Chemistry, School of Science and Engineering, Kindai University, Kowakae 3-4-1, Higashi-Osaka 577-8502, Osaka, Japan; h\_suzuki@chem.kindai.ac.jp

<sup>2</sup> obvioTec AG, Garstligweg 8, 8634 Hombrechtikon, Switzerland; urszulka.szczepaniak@gmail.com

<sup>3</sup> Univ Rennes, Ecole Nationale Supérieure de Chimie de Rennes, CNRS, ISCR – UMR6226, F-35000 Rennes, France; jean-claude.guillemin@ensc-rennes.fr

<sup>4</sup> Department of Chemistry, Graduate School of Science, Tokyo Metropolitan University, Minami-Osawa 1-1, Hachioji 192-0364, Tokyo, Japan; shiromaru-haruo@tmu.ac.jp

<sup>5</sup> Center for Basic Education and Integrated Learning, Kanagawa Institute of Technology, Shimo-Ogino 1030, Atsugi 243-0292, Kanagawa, Japan; kodama-takeshi@gen.kanagawa-it.ac.jp

<sup>6</sup> Department of Chemistry, Faculty of Science and Technology, Keio University, Hiyoshi 3-14-1, Yokohama 223-8522, Japan; hatanaka@chem.keio.ac.jp

\* Correspondence: wakaba@chem.kindai.ac.jp; Tel.: +81-6-4307-3408

For the assignment of vibrational modes of polyynes,  $C_8H_2$ ,  $C_{10}H_2$ , and  $C_{12}H_2$ , molecular orbital calculations were performed [S1]. Figure S1 summarizes calculated harmonic frequencies and observed vibrational frequencies in the phosphorescence spectra. Figure S2 illustrates deformation of polyyne molecules relevant to the vibrational-mode excitation upon the electronic transition of phosphorescence.

**Figure S1.** Harmonic vibrational-mode frequencies of  $C_{2n}H_2$  ( $n = 4-6$ ) scaled by 0.975 for anharmonicity correction by using molecular orbital calculations at the B3LYP/cc-pVDZ level of density-functional theory (DFT) [S1]. Markers in red and blue represent observed frequencies in the phosphorescence spectra, while the black markers represent the estimated fundamental frequencies. Open circles indicate the highest-intensity Raman-active modes of  $\sigma_g$  symmetry.

**Figure S2.** Displacements of atoms in the vibrational modes of (a)  $C_8H_2$ , (b)  $C_{10}H_2$ , and (c)  $C_{12}H_2$ .

## Reference

[S1] Frisch, M.J.; Trucks, G.W.; Schlegel, H.B.; Scuseria, G.E.; Robb, M.A.; Cheeseman, J.R.; Scalmani, G.; Barone, V.; Petersson, G.A.; Nakatsuji, H.; Li, X.; Caricato, M.; Marenich, A.V.; Bloino, J.; Janesko, B.G.; Gomperts, R.; Mennucci, B.; Hratchian, H.P.; Ortiz, J.V.; Izmaylov, A.F.; L. Sonnenberg, J.; Williams-Young, D.; Ding, F.; Lipparini, F.; Egidi, F.; Goings, J.; Peng, B.; Petrone, A.; Henderson, T.; Ranasinghe, D.; Zakrzewski, V.G.; Gao, J.; Rega, N.; Zheng, G.; Liang, W.; Hada, M.; Ehara, M.; Toyota, K.; Fukuda, R.; Hasegawa, J.; Ishida, M.; Nakajima, T.; Honda, Y.; Kitao, O.; Nakai, H.; Vreven, T.; Throssell, K.; Montgomery, Jr., J.A.; Peralta, J.E.; Ogliaro, F.; Bearpark, M.J.; Heyd, J.J.; Brothers, E.N.; Kudin, K.N.; Staroverov, V.N.; Keith, T.A.; Kobayashi, R.; Normand, J.; Raghavachari, K.; Rendell, A.P.; Burant, J.C.; Iyengar, S.S.; Tomasi, J.; Cossi, M.; Millam, J.M.; Klene, M.; Adamo, C.; Cammi, R.; Ochterski, J.W.; Martin, R.L.; Morokuma, K.; Farkas, O.; Foresman, J.B.; Fox, D.J. Gaussian 16, Revision C.01, Gaussian, Inc., Wallingford CT, 2019.

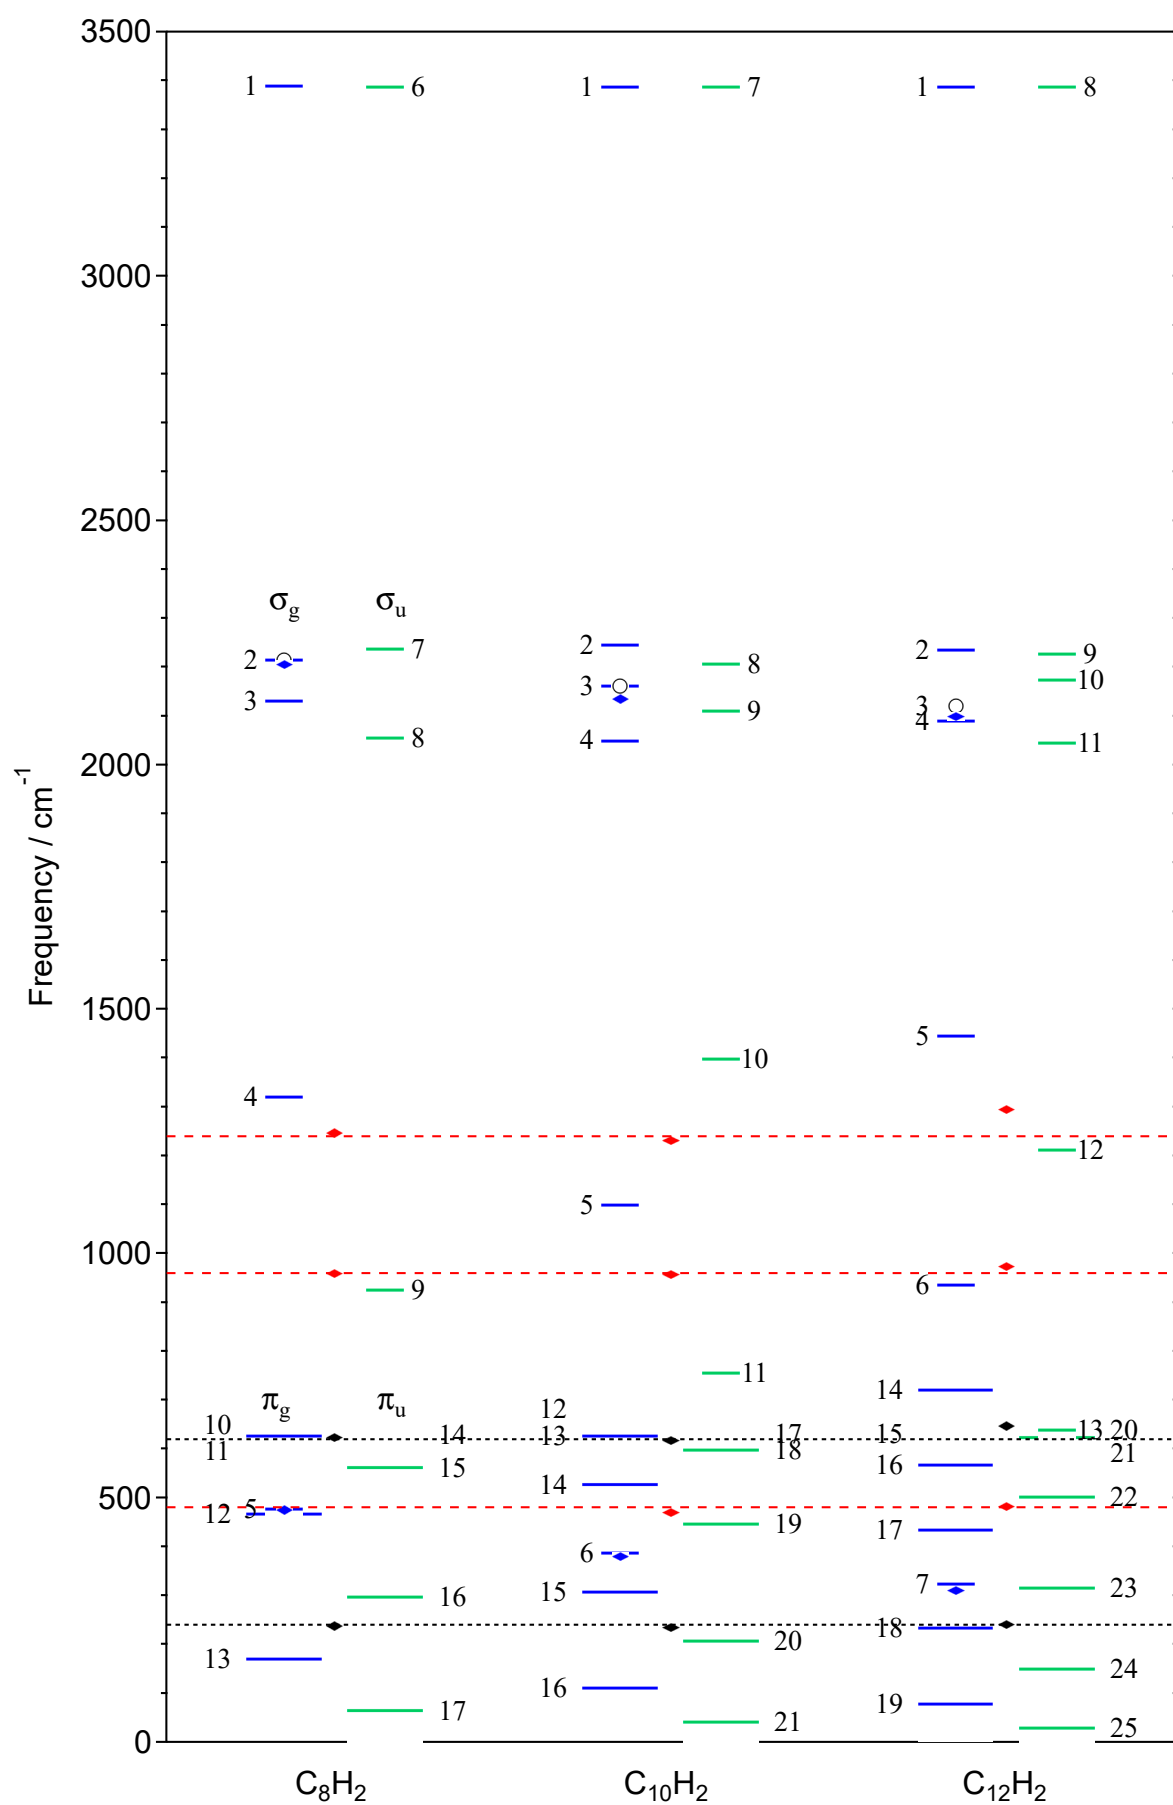

Figure S1.

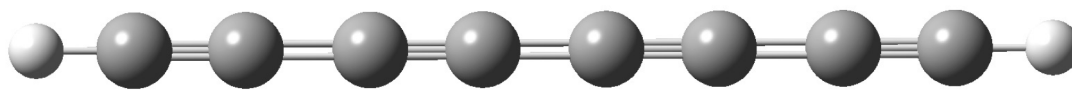

The equilibrium structure of C<sub>8</sub>H<sub>2</sub>.

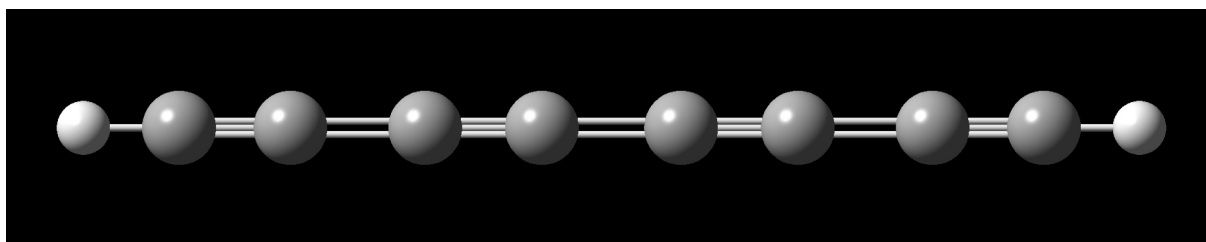

(ν<sub>5</sub>) breathing σ<sub>g</sub> mode of C<sub>8</sub>H<sub>2</sub>.

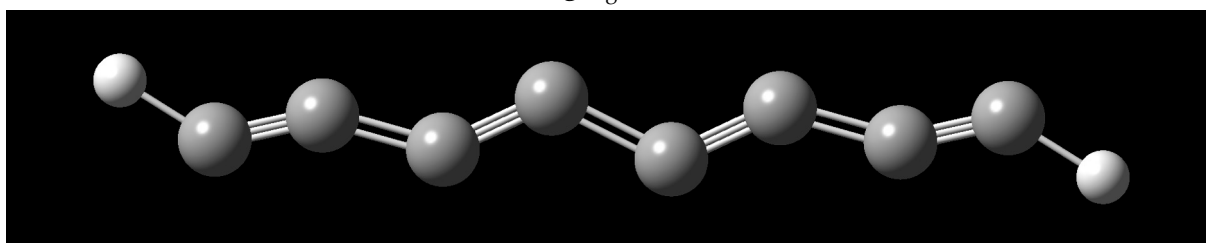

(ν<sub>11</sub>) *trans*-zigzag bending π<sub>g</sub> mode of C<sub>8</sub>H<sub>2</sub>.

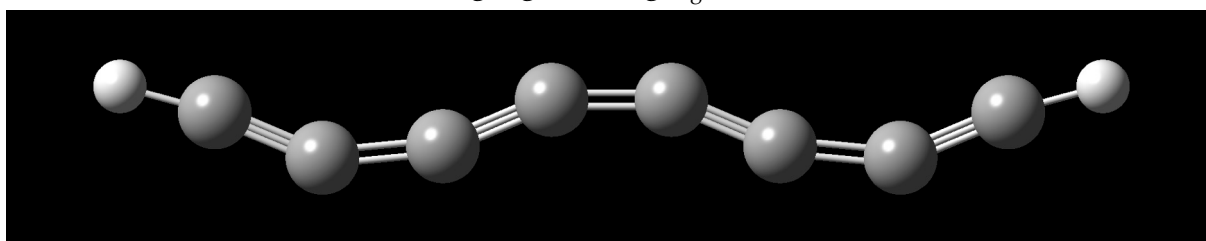

(ν<sub>16</sub>) *cis*-zigzag bending π<sub>u</sub> mode of C<sub>8</sub>H<sub>2</sub>.

**Figure S2.** (a) C<sub>8</sub>H<sub>2</sub>.

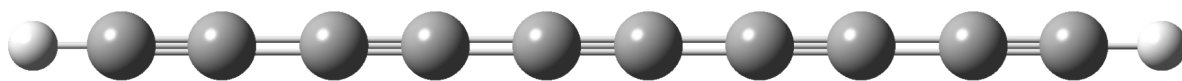

The equilibrium structure of C<sub>10</sub>H<sub>2</sub>.

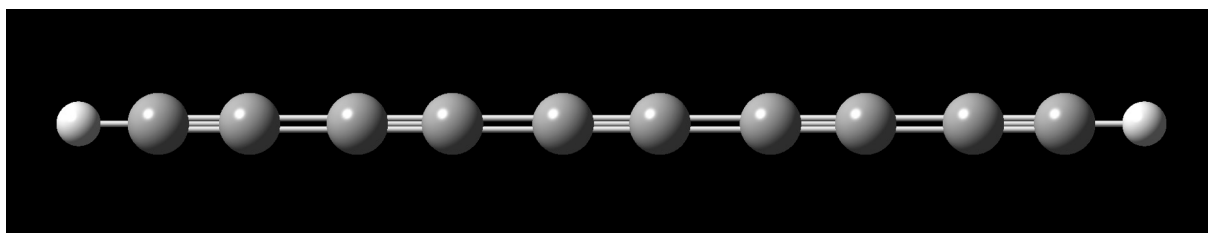

(ν<sub>6</sub>) breathing σ<sub>g</sub> mode of C<sub>10</sub>H<sub>2</sub>.

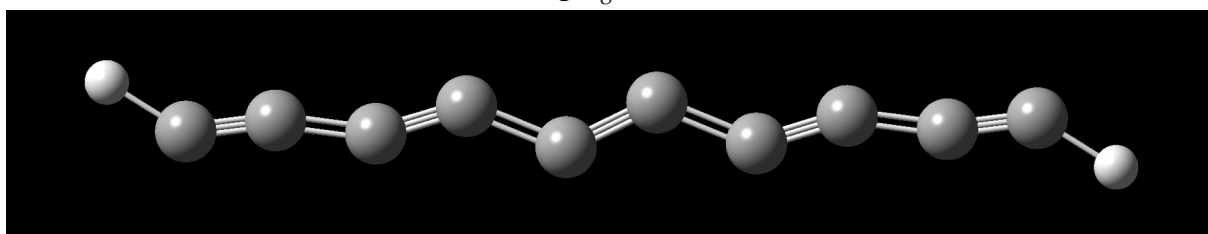

(ν<sub>13</sub>) *trans*-zigzag bending π<sub>g</sub> mode of C<sub>10</sub>H<sub>2</sub>.

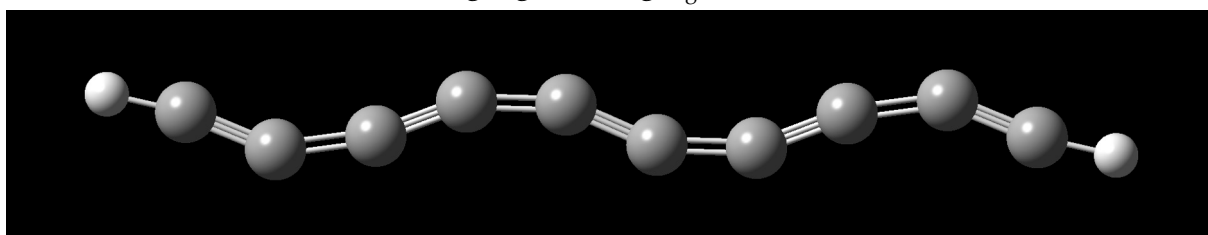

(ν<sub>15</sub>) *cis*-zigzag bending π<sub>g</sub> mode of C<sub>10</sub>H<sub>2</sub>.

**Figure S2.** (b) C<sub>10</sub>H<sub>2</sub>.

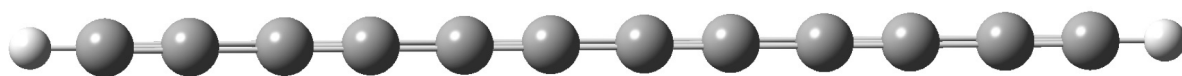

The equilibrium structure of C<sub>12</sub>H<sub>2</sub>.

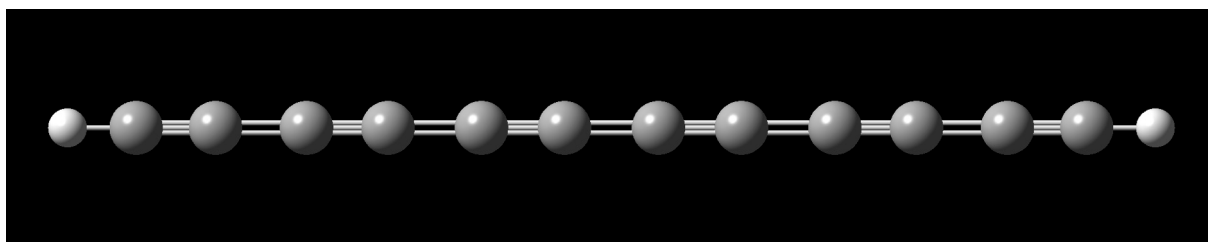

(v<sub>7</sub>) breathing  $\sigma_g$  mode of C<sub>12</sub>H<sub>2</sub>.

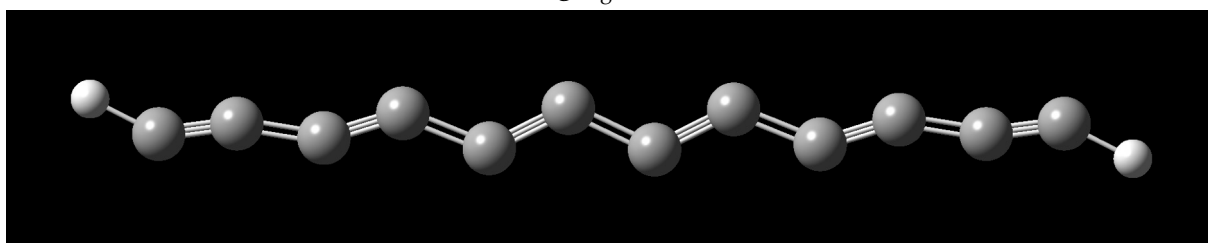

(v<sub>15</sub>) *trans*-zigzag bending  $\pi_g$  mode of C<sub>12</sub>H<sub>2</sub>.

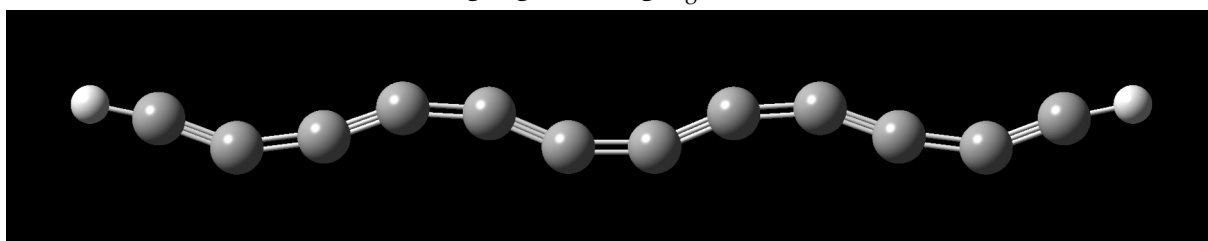

(v<sub>23</sub>) *cis*-zigzag bending  $\pi_u$  mode of C<sub>12</sub>H<sub>2</sub>.

**Figure S2.** (c) C<sub>12</sub>H<sub>2</sub>.
